# Supplementary material for: Interconversion between Lewis and Brønsted–Lowry acid sites on vanadia-based catalysts
Source: Royal Society of Chemistry journal article supplement (doi:10.1039/d1cp05261f), 2022-01-01
Supplement: d1cp05261f1.pdf [file d1cp05261f1.pdf]

## **SUPPORTING INFORMATION**

### **Interconversion between Lewis and Brønsted-Lowry acid sites on vanadia-based catalysts**

Rob Jeremiah G. Nuguid<sup>1,2</sup>, Lorenzo Ortino-Ghini<sup>1,3</sup>, Vitaly L. Suskevich<sup>1</sup>, Jie Yang<sup>1,4</sup>, Luca Lietti<sup>3</sup>, Oliver Kröcher<sup>1,2</sup>, Davide Ferri<sup>1,\*</sup>

<sup>1</sup>Paul Scherrer Institut, CH-5232 Villigen PSI, Switzerland

<sup>2</sup>Institute of Chemical Sciences and Engineering, École polytechnique fédérale de Lausanne (EPFL), CH-1015 Lausanne, Switzerland

<sup>3</sup>Department of Chemistry, Politecnico di Milano, 20133, Milan, Italy

<sup>4</sup>College of Materials Science and Engineering, Chongqing University, Chongqing 400044, China

\* Corresponding author: [davide.ferri@psi.ch](mailto:davide.ferri@psi.ch)

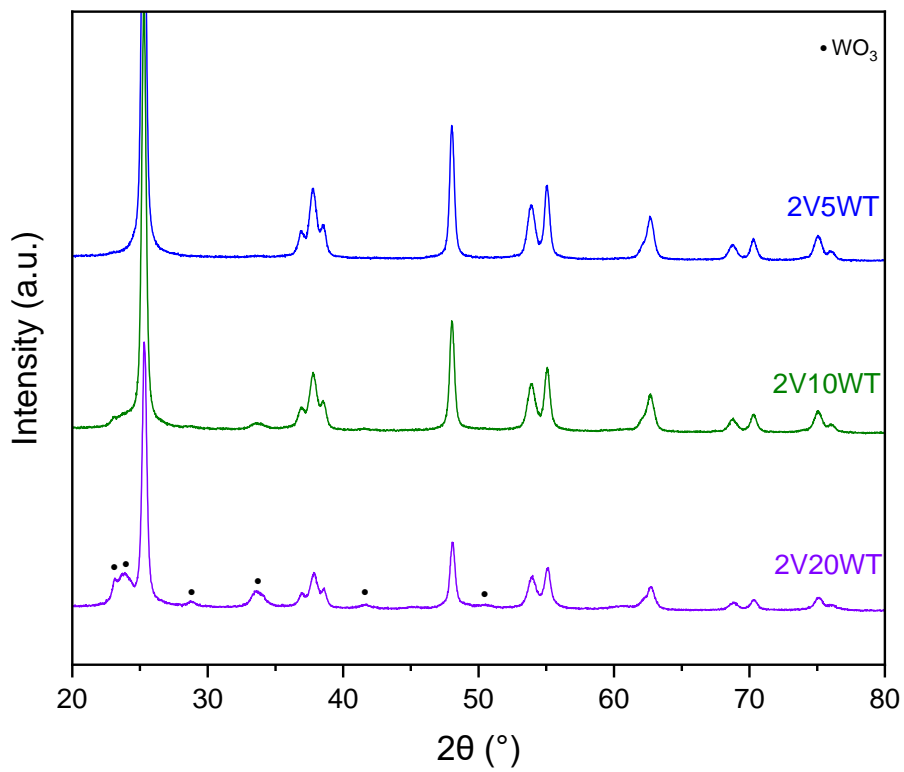

Fig. S1. Powder XRD of 2V5WT, 2V10WT, and 2V20WT.

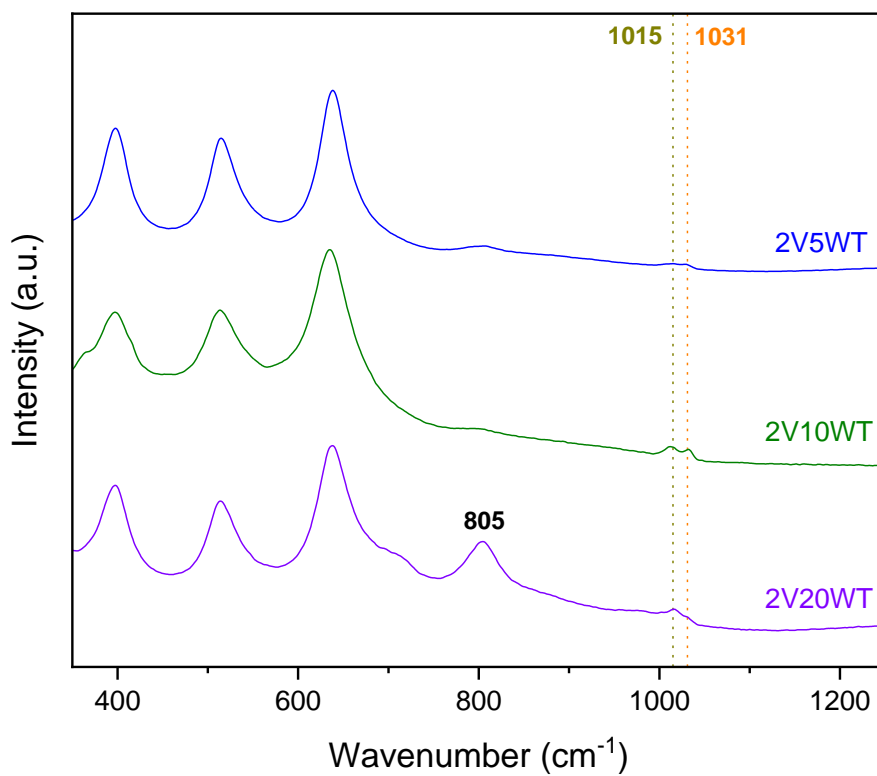

Fig. S2. Raman spectra of 2V5WT, 2V10WT, and 2V20WT under 5 vol% O<sub>2</sub> balanced in Ar at 250 °C. The vibrations at 1031 and 1015 cm<sup>-1</sup> are the stretching modes of V=O and W=O groups, respectively, while the vibration at 806 cm<sup>-1</sup> belongs to bulk WO<sub>3</sub>.

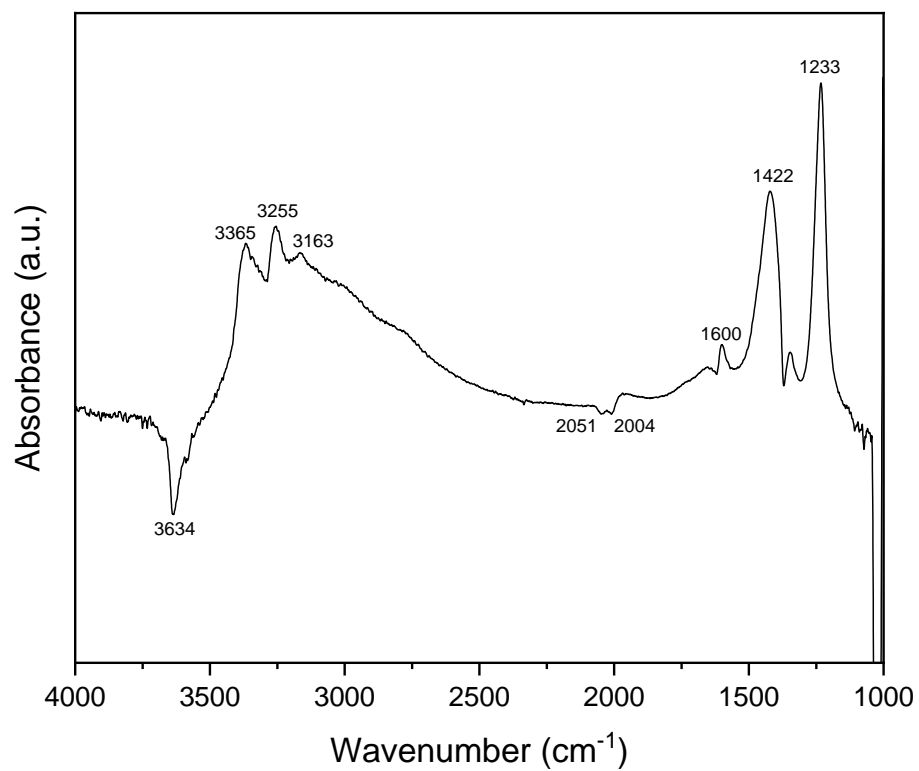

Fig. S3. Transmission IR spectrum of 2V10WT under 1000 ppm NH<sub>3</sub> and 5 vol% O<sub>2</sub> balanced in Ar at 400 °C. The vibrations are assigned in the main text.

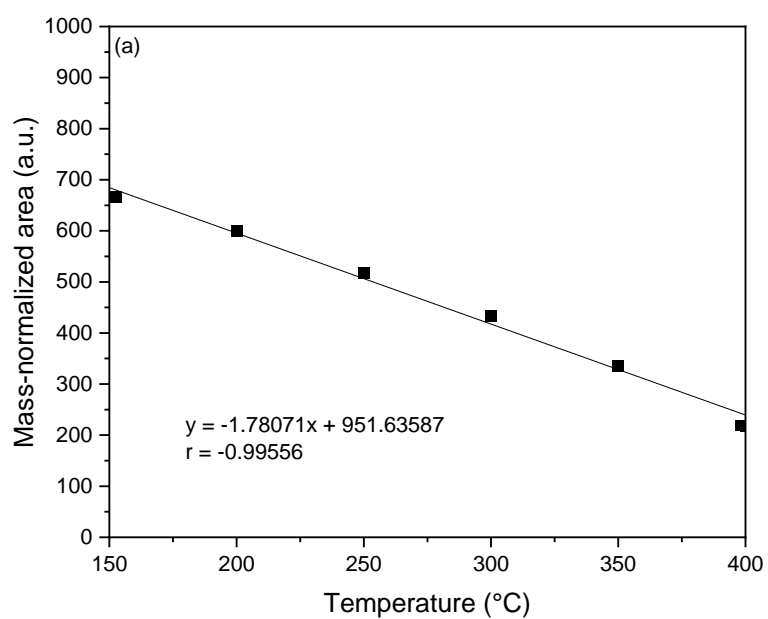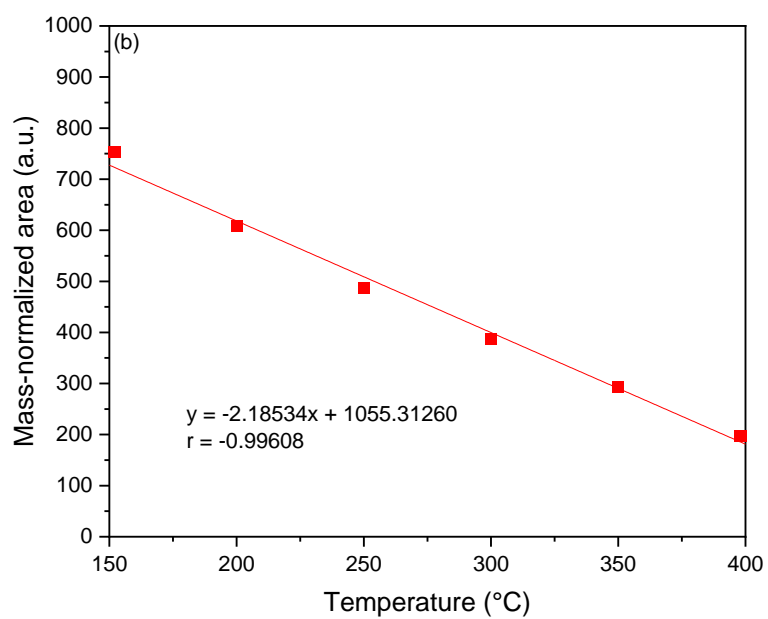

Fig. S4. Linear fitting of the mass-normalized areas of (a) LAS and (b) BAS as a function of temperature.

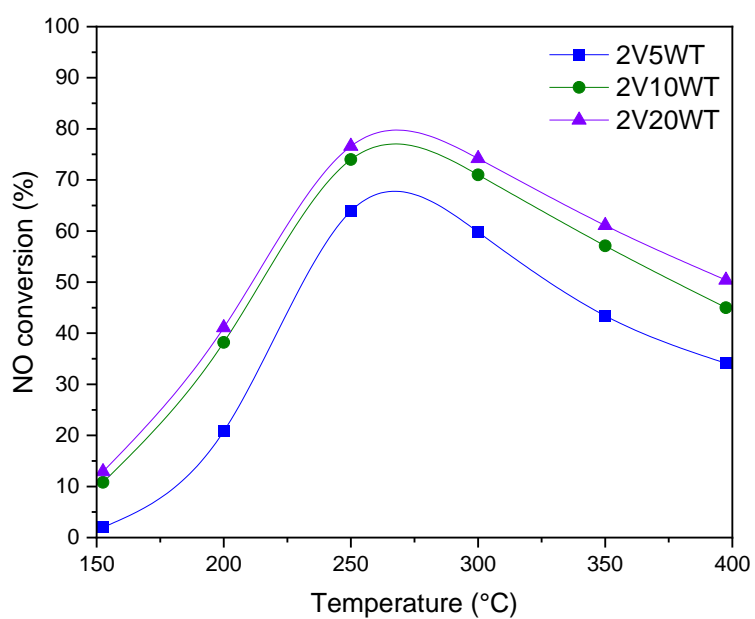

Fig. S5. NO conversion of 2V5WT, 2V10WT, and 2V20WT in the spectroscopic cell.

Experimental conditions: 1000 ppm NO, 1000 ppm NH<sub>3</sub>, 5 vol% O<sub>2</sub> balanced in Ar.
